# Supplementary figures and images for: Dual-mode nanophotonic upconversion oxygen sensors
Source: Royal Society of Chemistry journal article supplement (doi:10.1039/d2nr02193e), 2022-01-01

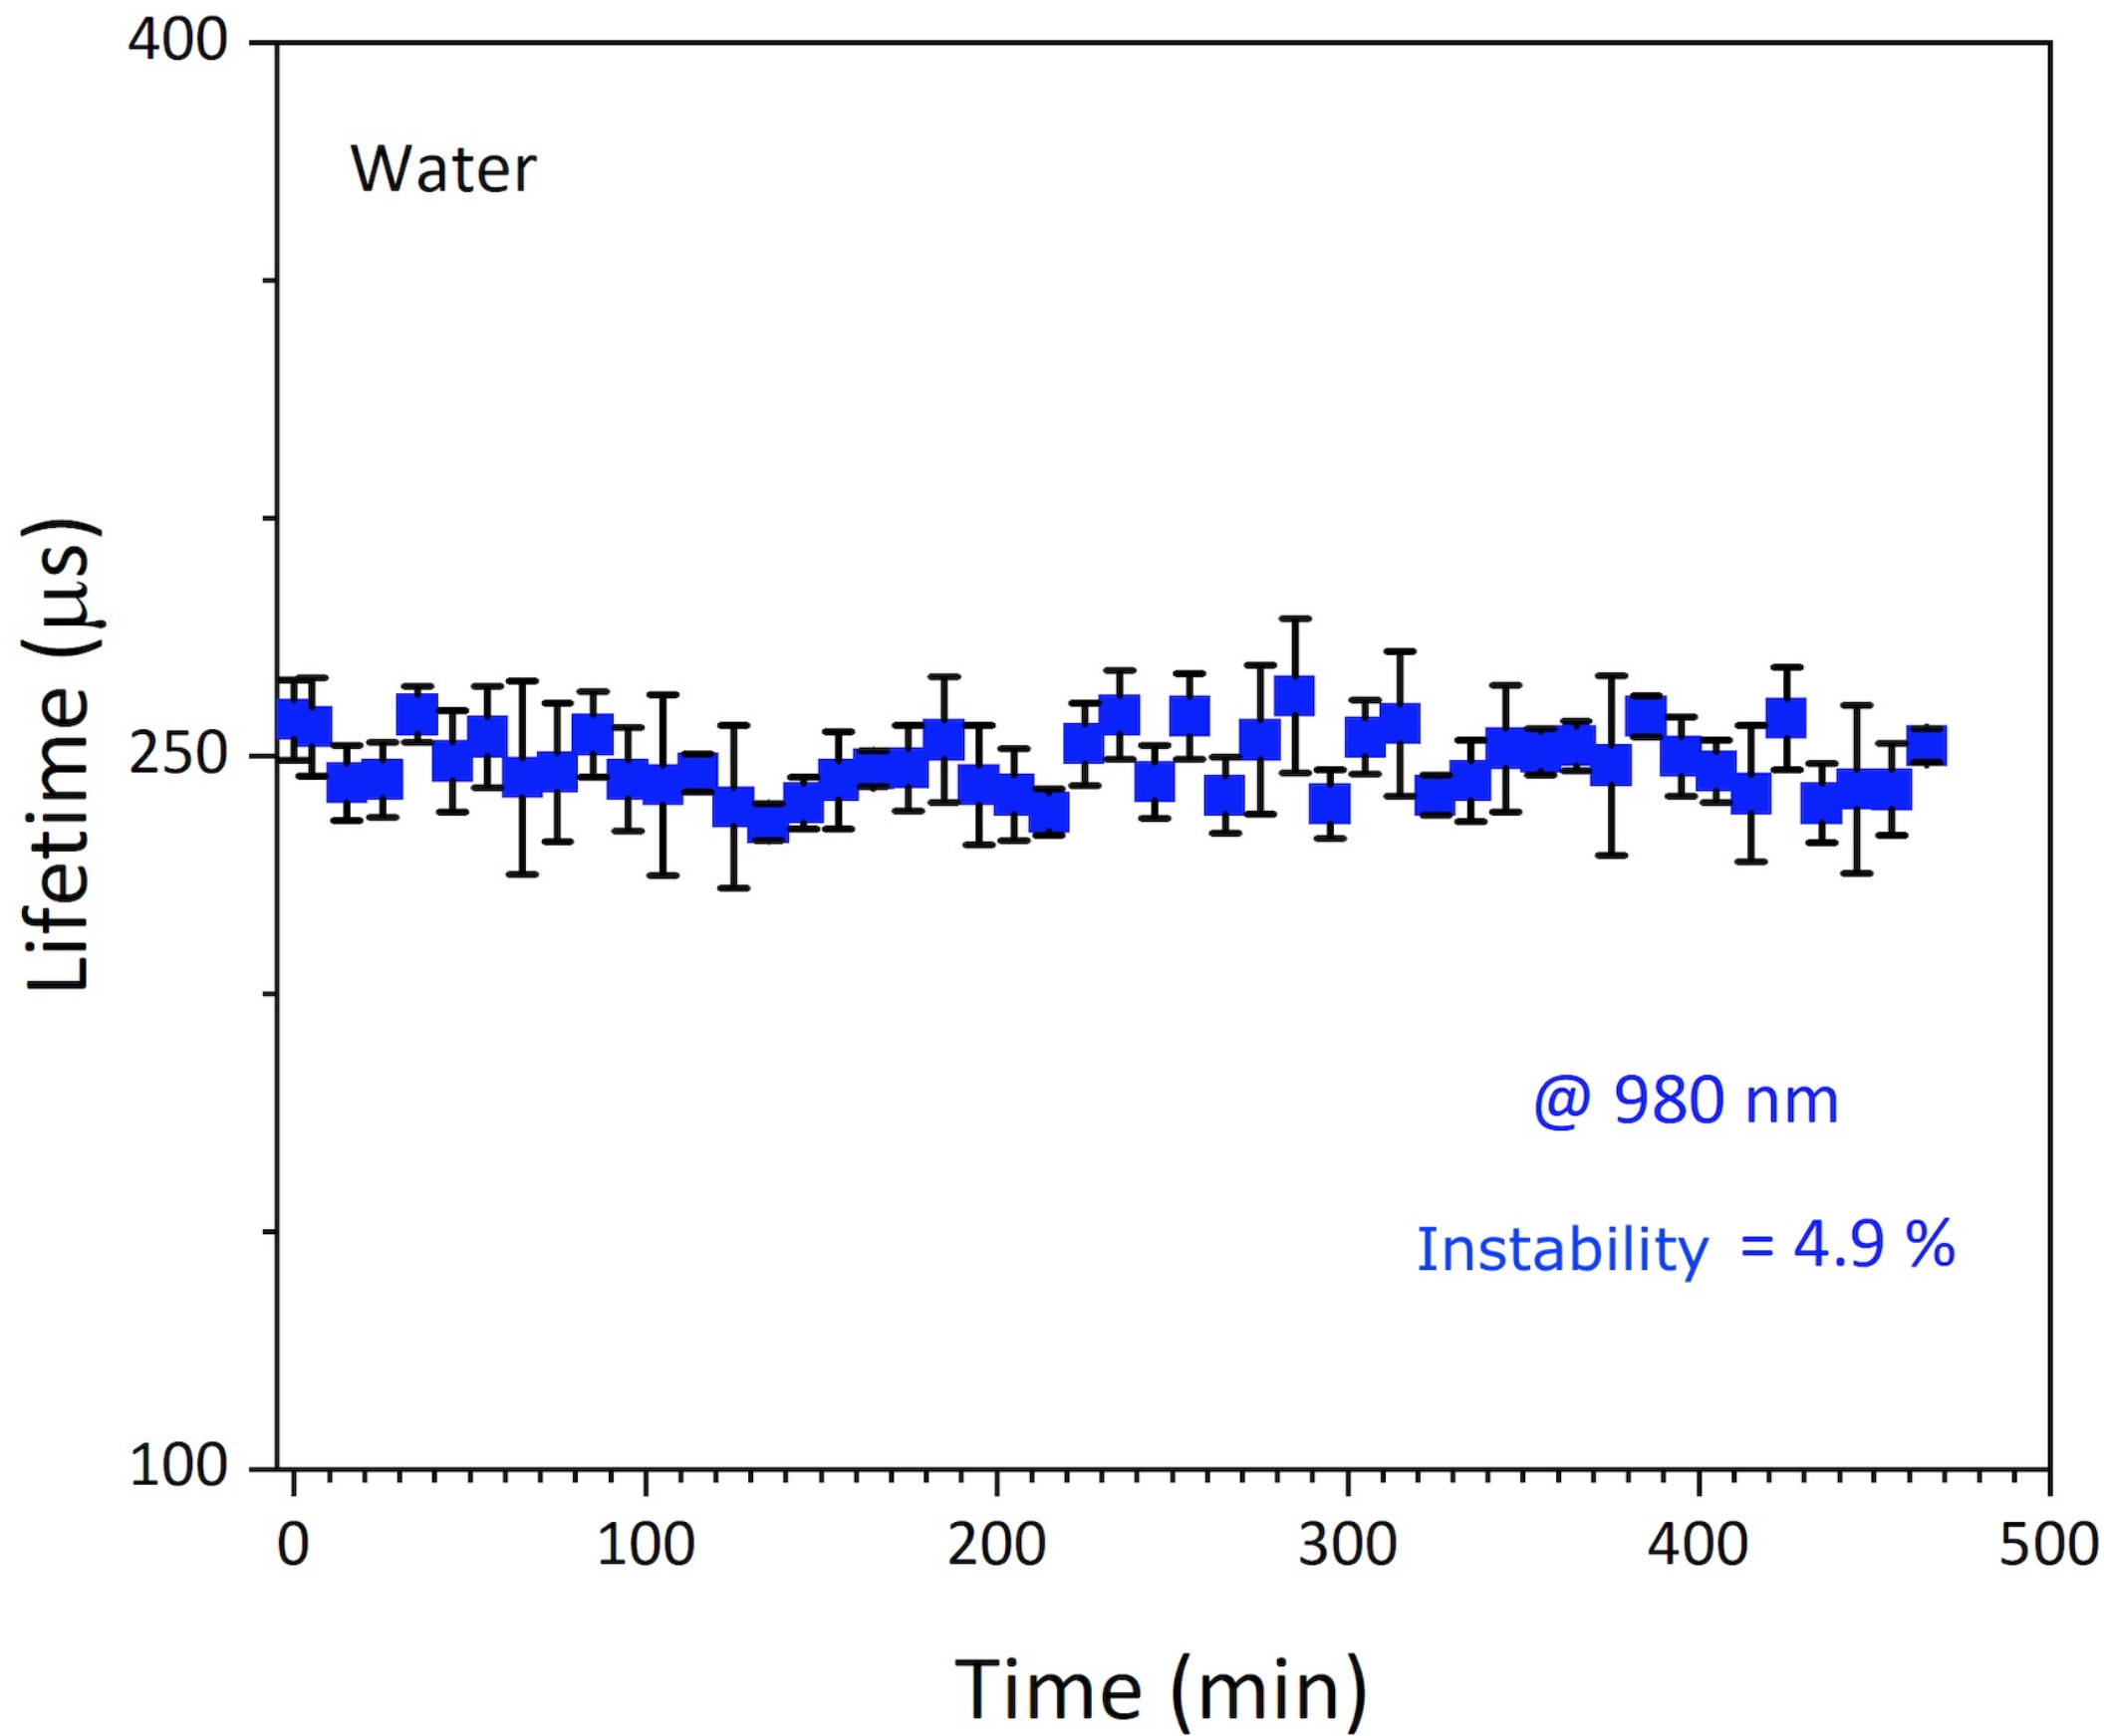

Supplement: d2nr02193e1.pdf [file d2nr02193e1.pdf]
